# Supplementary material for: Prognostic value of a novel risk classification of microvascular invasion in patients with hepatocellular carcinoma after resection
Source: PubMed Central journal article supplement (PMC5354924; doi:10.18632/oncotarget.12547), 2016-10-09
Supplement: oncotarget-08-5474-s001.pdf [file oncotarget-08-5474-s001.pdf]

# Prognostic value of a novel risk classification of microvascular invasion in patients with hepatocellular carcinoma after resection

## Supplementary Material

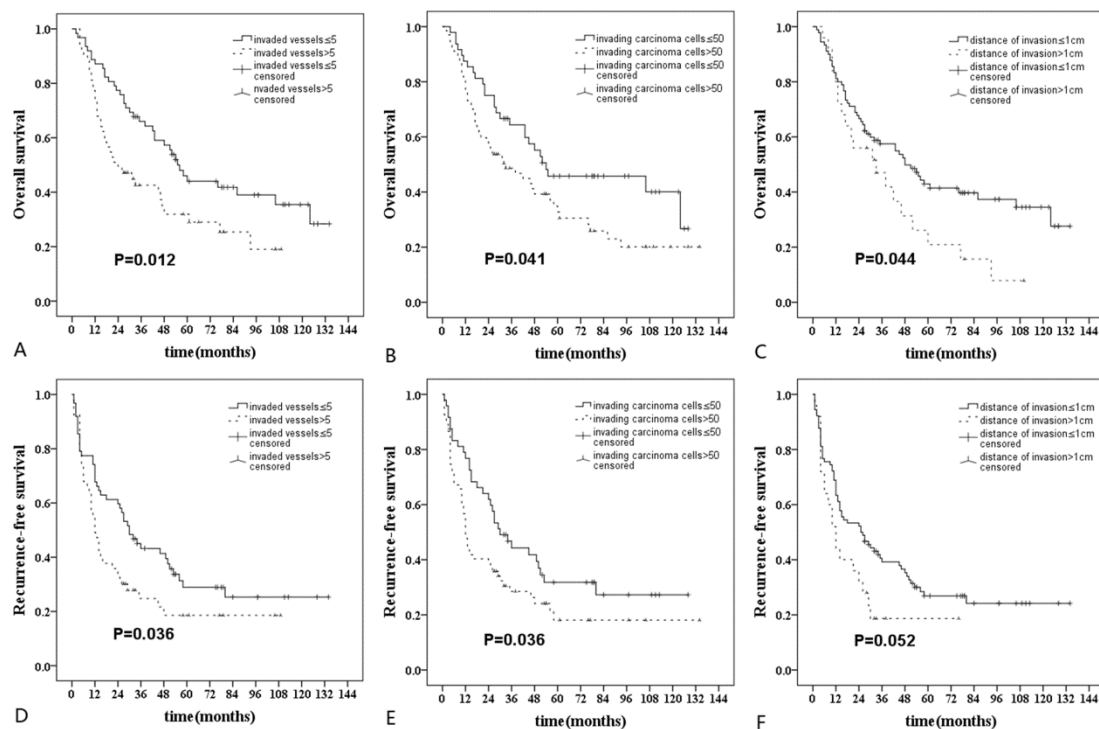

**Supplementary Figure 1:** The overall and recurrence-free survival curves of different pathological characteristics of microvascular invasion in hepatocellular carcinoma patients. **A**, Comparison of OS rate ( $P=0.012$ ) and **D**, RFS rate ( $P=0.036$ ) in the group of invaded microvessels  $\leq 5$  ( $n=62$ ) and  $> 5$  ( $n=53$ ); **B**, Comparison of OS rate ( $P=0.041$ ) and **E**, RFS rate ( $P=0.036$ ) in the group of invading carcinoma cells  $\leq 50$  ( $n=48$ ) and  $> 50$  ( $n=67$ ); **C**, Comparison of OS rate ( $P=0.044$ ) and **F**, RFS rate ( $P=0.052$ ) in the group of distance of invasion from tumor edge  $\leq 1$  cm ( $n=90$ ) and  $> 1$  cm ( $n=25$ ).

OS, overall survival; RFS, recurrence-free survival.

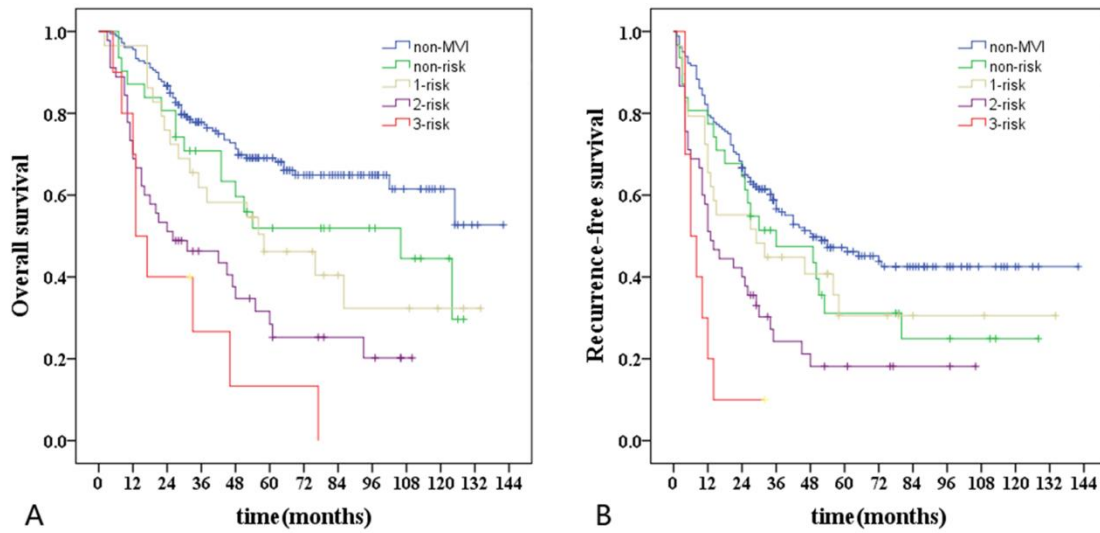

**Supplementary Figure 2: A**, The overall ( $P < 0.001$ ) and **B**, recurrence-free survival ( $P < 0.001$ ) curves of hepatocellular carcinoma patients without microvascular invasion ( $n=180$ ), with no risk factor ( $n=31$ ), one risk factor ( $n=27$ ), two risk factors ( $n=47$ ) and three risk factors ( $n=10$ ) of microvascular invasion.
